# Supplementary material for: Health as a Key Driver of Climate Change Communication. A Scoping Review
Source: Preprints.org preprint supplement (doi:10.20944/preprints202010.0095.v1), 2020-10-05
Supplement: Supplementary file 1 [file supplementary]

**Table S1** List of included publications on CCC&H

| Category by themes | Author | Year | Reference | Article title | Geographical region |
| --- | --- | --- | --- | --- | --- |
| 1. Reframing climate change as a health issue | Bostrom et al. | 2013 | [32] | Targeting and tailoring climate change communications | Not given/NA* |
| DeNicola et al. | 2014 | [33] | Environmental attitudes and political partisanship | United States |
| Frumkin et al. | 2008 | [24] | Climate change and public health: thinking, communicating, acting | Not given/NA* |
| Humphreys et al. | 2014 | [34] | Reframing climate change as a health issue | Not given/NA* |
| Maibach et al. | 2008 | [14] | Communication and marketing as climate change-intervention assets a public health perspective | United States |
| Maibach et al. | 2010 | [12] | Reframing climate change as a public health issue: an exploratory study of public reactions | United States |
| Myers et al. | 2012 | [29] | A public health frame arouses hopeful emotions about climate change | United States |
| Ring et al. | 2015 | [39] | Inspire Hope, Not Fear: Communicating Effectively About Climate Change and Health | Not given/NA* |
| Semenza | 2011 | [28] | Climate change and climate variability: personal motivation for adaptation and mitigation | United States |
| Valles | 2014 | [35] | Bioethics and the Framing of Climate Change's Health Risks | Not given/NA* |
| 2. The role of health professionals | Adlong et al. | 2014 | [11] | Environmental education and the health professions: framing climate change as a health issue | Not given/NA* |
| Adlong et al. | 2015 | [41] | Nursing and climate change: An emerging connection | Not given/NA* |
| Barna et al. | 2012 | [30] | The health effects of climate change: what does a nurse need to know? | UK |
| Chadwick et al. | 2016 | [42] | Climate Change, Health, and Communication: A Primer |  |
| Gould et al. | 2015 | [40] | Challenges and Opportunities for Advancing Work on Climate Change and Public Health | United States |
| Johnson et al. | 2013 | [31] | Climate change: Role of GPs in communicating lifestyle messages that are good for health and the climate | UK |
| Koh et al. | 2016 | [43] | Communicating the Health Effects of Climate Change | Not given/NA* |
| **Table S1** continued | |  |  |  |  |
| Category by themes | Author | Year | Reference | Article title | Geographical region |
|  | Nigatu et al. | 2014 | [36] | Knowledge and perceptions about the health impact of climate change among health sciences students in Ethiopia: a cross-sectional study | Ethiopia |
|  | Patz et al. | 2014 | [37] | Climate change: challenges and opportunities for global health | United Sates |
|  | Sayre et al. | 2010 | [27] | Climate change and human health: the role of nurses in confronting the issue | Not given/NA* |
| 3. The perception of climate change | Wei et al. | 2014 | [38] | Perception, attitude and behavior in relation to climate change: a survey among CDC health professionals in Shanxi province, China | China |
|  | Akerlof et al. | 2010 | [25] | Public perceptions of climate change as a human health risk: surveys of the United States, Canada and Malta | United Sates, Canada, Malta |
| Cardwell et al. | 2010 | [13] | Making the links: do we connect climate change with health? A qualitative case study from Canada | Canada |
| DeBono et al. | 2010 | [26] | Risk communication: climate change as a human-health threat, a survey of public perceptions in Malta | Malta |

*Not applicable
